# Supplementary material
Source: Royal Society of Chemistry journal article supplement (https://www.rsc.org/suppdata/dt/1999/2049/808557i.doc)
Supplement: Supplementary file 1 [file 808557i.doc]

Supplementary Table S0 Reactions of **8** with oxyanionic substrates.

| R | n | Compound  Number | Ratio  Alcohol/  Cl-Terpy | Base/  (equivalents-to alcohol) | % Yield |
| --- | --- | --- | --- | --- | --- |
| OH | **3** | **O-3** | **5** | **KOH(1)** | **85** |
|  | **4** | **O-4** | **5** | **KOH(1)** | **79** |
|  | **6** | **O-5** | **5** | **KOH(1)** | **76** |
|  | **8** | **O-6** | **5** | **KOH(1)** | **75** |
|  | **10** | **O-7** | **5** | **KOH(1)** | **65** |
|  | **3** | **O-3** | **1.2** | **KOH(1.5)** | **50** |
| OTBDMS* | **3** | **O-3** | **5** | **KOH(1.5)** | **75** |
| NH2 | **3** | **O-2** | **5** | **KOH(1.2)** | **45** |
|  | **3** | **O-2** | **5** | **NaH(2.5)** | **55** |
| COOH | **3** | **O-1** | **1.0** | **KOH(5)** | **80** |
|  | **3** | **O-1** | **5** | **KOH(5)** | **80** |
|  | **3** | **O-1** | **5** | **KOH(1.5)** | **75** |

*=TBDMS protecting group was lost during the reaction.
